# Supplementary material for: Nicotinic Acid Phosphoribosyltransferase Regulates Cancer Cell Metabolism, Susceptibility to NAMPT Inhibitors, and DNA Repair
Source: Oxford University Press journal article supplement (doi:10.1158/0008-5472.can-16-3079), 2017-05-15
Supplement: 00085472can163079-sup-174461_2_unknown_upload_4029638_mpqj4m.pdf [file 00085472can163079-sup-174461_2_unknown_upload_4029638_mpqj4m.pdf]

**A**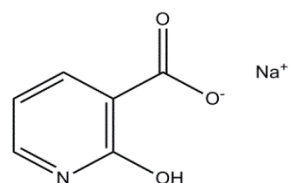

2-hydroxynicotinate sodium salt  
(2-HNANa)

**B**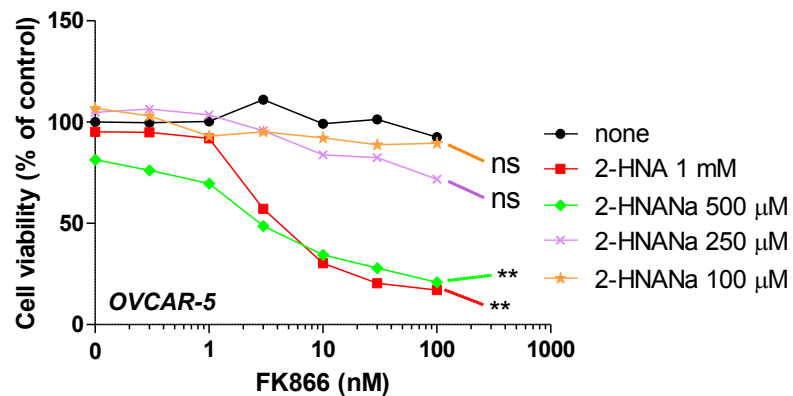

**Figure S7. 2-hydroxynicotinate sodium salt (2-HNANa) effectively sensitizes OVCAR-5 cells to FK866.** A, Chemical structure of 2-HNANa. B,  $2 \times 10^3$  OVCAR-5 cells/well were plated in 96-well plates, allowed to adhere overnight and then incubated for 72 h w/ or w/o FK866 at the indicated concentrations in the presence or absence of the indicated concentrations of 2-HNA or of 2-HNANa. Thereafter, cell viability was detected with SRB (B). B, Data are presented as means of three separate experiments. In panel B, the statistical analysis refers to the experimental values obtained with 100 nM FK866. ns: non-significant; \*\*:  $p < 0.01$ .
